# Supplementary material for: Resonance-enhanced excitation and relaxation dynamics of coherent phonons in Fe1.14Te
Source: Royal Society of Chemistry journal article supplement (doi:10.1039/d3cp03653g), 2023-01-01
Supplement: d3cp03653g1.pdf [file d3cp03653g1.pdf]

*Supplementary Information for*

**Resonance-enhanced excitation and relaxation dynamics of coherent phonons in Fe<sub>1.14</sub>Te**

Ning Li,<sup>a</sup> Chenhui Zhang,<sup>b</sup> Weizheng Liang,<sup>c</sup> Yaohua Jiang,<sup>a</sup> Xi-Xiang Zhang,<sup>b</sup> Yang Mi,<sup>\*a</sup> and Sheng-Nian Luo<sup>a</sup>

*<sup>a</sup>Key Laboratory of Advanced Technologies of Materials, Ministry of Education, School of Materials Science and Engineering, Southwest Jiaotong University, Chengdu 610031, People's Republic of China.*

*E-mail: miyang@swjtu.edu.cn*

*<sup>b</sup>Physical Science and Engineering Division, King Abdullah University of Science and Technology, Thuwal 23955-6900, Saudi Arabia*

*<sup>c</sup>School of Resources, Environment and Materials, Guangxi University, Nanning 530004, People's Republic of China*

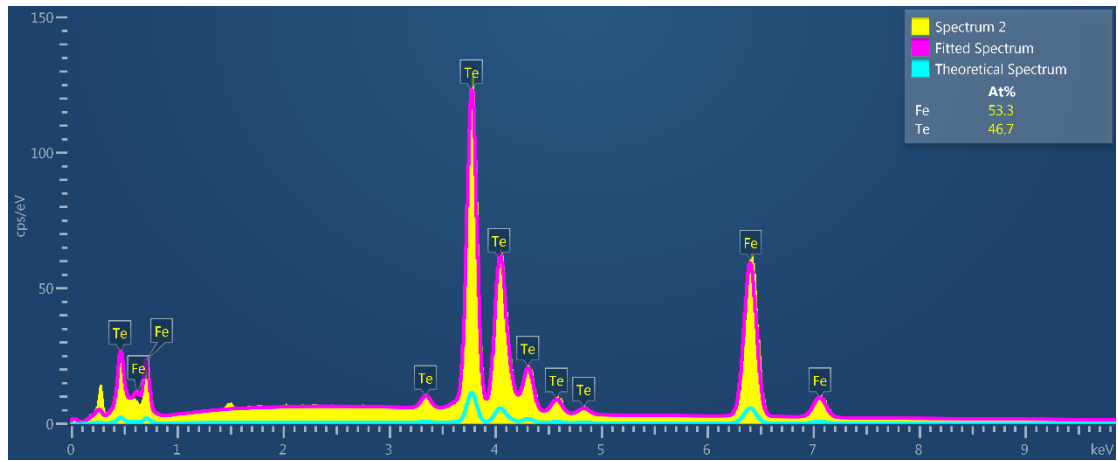

**Fig. S1.** EDS characterization of the synthesized sample, revealing the Fe/Te composition ratio of 1.14:1.

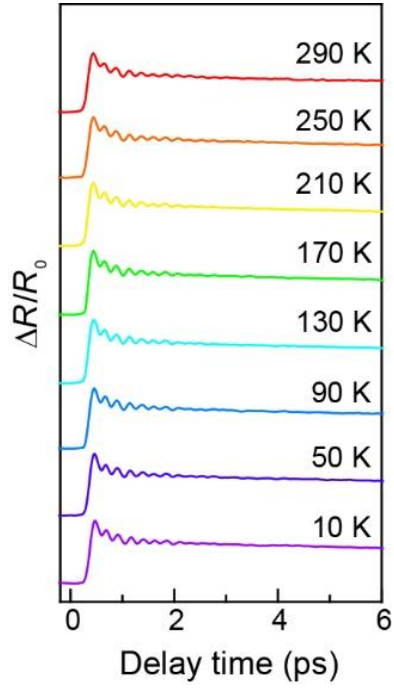

**Fig. S2.**  $\Delta R(t)/R_0$  time series of single-crystal  $\text{Fe}_{1.14}\text{Te}$  collected at different temperature under 1.569-eV excitation.

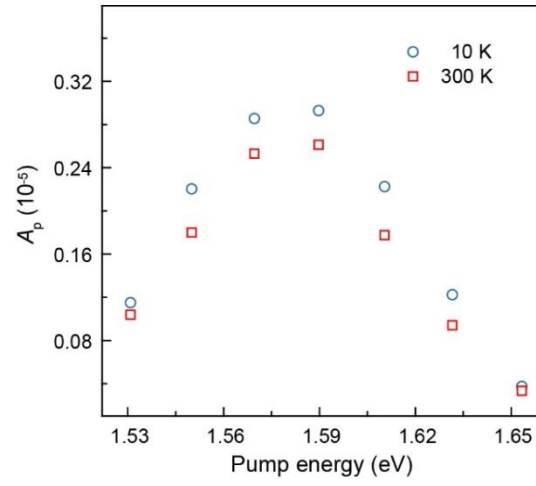

**Fig. S3.**  $A_p$  of the  $A_{1g}$  phonons as a function of pump photon energy at 10 K and 300 K.

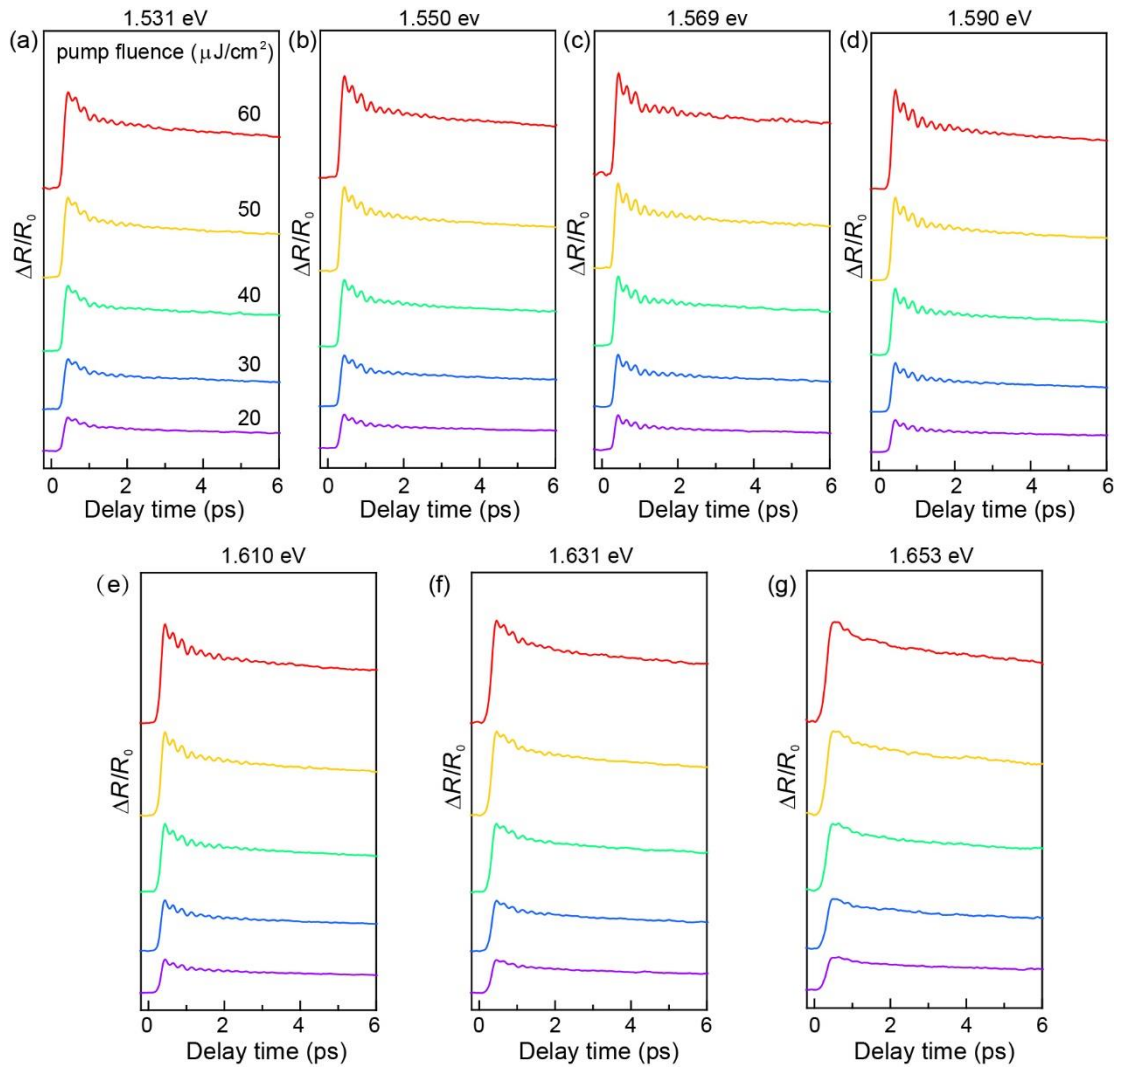

**Fig. S4.**  $\Delta R(t)/R_0$  time series at different pump fluence with photon energy varying from 1.531 eV to 1.653 eV.

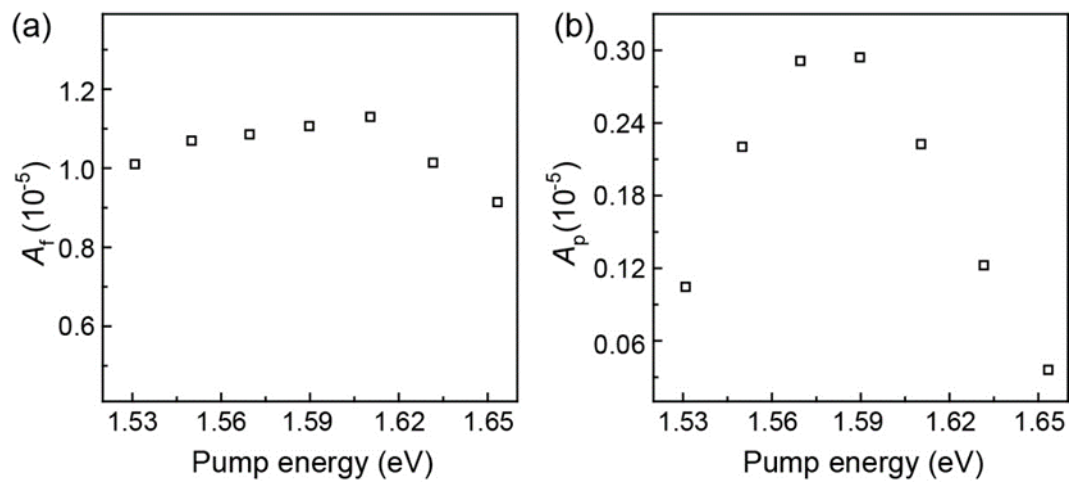

**Fig. S5.**  $A_f$  and  $A_p$  as a function of pump photon energy obtained from Fig. 4(a).
